# Supplementary material for: Ring opening metathesis polymerization on non-covalently functionalized single-walled carbon nanotubesElectronic supplementary information (ESI) available: full experimental details for compounds 2–4, nanotube preparation and microscopy analysis. See http://www.rsc.org/suppdata/cc/b2/b211194b/
Source: Royal Society of Chemistry journal article supplement (doi:10.1039/b211194b), 2002-12-12
Supplement: b211194b.doc [file b211194b.doc]

Ring Opening Metathesis Polymerization on Non-Covalently Functionalized Single-Walled Carbon Nanotubes

Fernando J. Gómez, Robert J. Chen, Dunwei Wang, Robert M. Waymouth,* and Hongjie Dai*

Chemistry Department, Stanford University, Stanford, California 94305

**SUPPORTING INFORMATION**

**Experimental Section**

**General.** Unless otherwise stated, all synthetic manipulations were conducted using standard Schlenk techniques or in a nitrogen-purged drybox. All solvents were purified by passing through towers containing Q5 and alumina. Norbornene (Aldrich) was purified by reduced pressure sublimation and stored under a nitrogen atmosphere in the dark. 4-Vinylaniline (Aldrich, technical grade) was purified by column chromatography (silica gel, Et2O) and used immediately afterwards. Triethylamine was dried and distilled prior to use. Oxalyl chloride, 4-(1-pyrenyl)butyric acid, N,N-dimethylformamide, 2-Norbornen-5-ylmethanol, and N,N-dimethylaminopyridine (Aldrich) were used as received. Cl2(PCy3)2Ru=CHPh were generously provided by Prof. Ken Wagener (University of Florida), or purchased from Strem Chemicals. Gold microgrids (gilder fine bar, 1000 mesh, 3.05 mm O.D) for transmission electron microscopy were obtained from Ted Pella, Inc. SiO2 substrates were prepared in-house via thermal oxidation of commercial-grade silicon wafers. Transmission electron microscopy was performed on a Philips CM20 FEG-TEM operating at 200 kV in high resolution (HRTEM) mode, under bright field. Atomic force microscopy was performed with a Digital Instruments Multimode Scanning Probe Microscope in tapping mode. NMR spectra were recorded using a Varian GX-400 NMR spectrometer and referenced against TMS or the residual protons of the deuterated solvents (1H-NMR: CDCl3 = 7.26 ppm, CD2Cl2 = 5.36 ppm; 13C-NMR: CDCl3 = 77.0 ppm, CD2Cl2 = 53.8 ppm). Assignments refer to the arbitrarily labeled structures *below* the procedure paragraph, and were based on previously published spectroscopic analyses of substituted norbornenes,[[1]](#endnote-2) pyrenes,[[2]](#endnote-3) and various ruthenium alkylidenes.[[3]](#endnote-4)

**4-Pyren-1-yl-butyroyl chloride** (**1**). Adapted from a literature procedure.[[4]](#endnote-5) To a suspension of 4-(1-pyrenyl)butyric acid (1.33 g, 4.63 mmol) in ca. 150 mL of dry CH2Cl2 was added neat oxalyl chloride (1.4 mL, ca. 14 mmol) and two drops of DMF. No significant change was observed during the dropwise addition of (COCl)2, but complete dissolution of the acid was observed upon addition of DMF. The resultant gold-yellow solution was stirred at room temperature for 5 h, and the volatiles were removed in vacuo. Diethyl ether (15 mL) and pentane (ca. 30 mL) were added to the resulting light brown solid, and the resulting suspension was stirred for ca. 10 min. The supernatant was decanted using a cannula, and the solid was rinsed with pentane (110 mL). The resultant off-white solid was dried under vacuum (982 mg, 69% yield). 1H-NMR (, CDCl3): 8.25 (1H, d, 3*J*=9.4 Hz, *H*10), 8.20 (1H, d, 3*J*=7.6 Hz, *H*8/*H*6), 8.18 (1H, d, 3*J*=6.8 Hz, *H*8/*H*6), 8.14 (1H, d, 3*J*=9.4 Hz, *H*9), 8.13, (1H, d, 3*J*=8.8 Hz, *H*3), 8.04 (2H, A2, *H*4, *H*5), 8.01 (1H, dd, 3*J*=7.6, 6.8 Hz, *H*7), 7.84 (1H, d, 3*J*=8.8 Hz, *H*2), 3.43 (2H, t, 3*J*=7.7 Hz, Ar-C*H*2), 3.02 (2H, t, 3*J*=7.1 Hz, C*H*2-CO), 2.27 (2H, m, CH2-C*H*2-CH2).

**4-Pyren-1-yl-butyric acid bicyclo[2.2.1]hept-5-en-2-ylmethyl ester** (**2**). An oven-dried Schlenk flask containing 2-norbornen-5-ylmethanol (38 L, 0.31 mmol), triethylamine (85 L, 0.6 mmol) and a crystal of DMAP in ca. 10 mL of diethyl ether was chilled to 0 °C. Dropwise addition of a solution of 4-(1-pyrenyl)butyroyl chloride (101 mg, 0.31 mmol) in diethyl ether (5 mL) caused immediate turbidity. The resulting mixture was allowed to warm to room temperature and stirred for 8 h. After this time, the mixture was poured over deionized water, and the organic layer separated. The aqueous layer was extracted with water (3  10 mL) and the organics were dried over MgSO4. Rotary evaporation afforded crude product as a yellow oil, further purified by column chromatography on silica gel (hexanes/ethyl acetate 5:1). The pure product was isolated in 73% yield as a mixture of *endo*- (*n*) and *exo*- (*x*) isomers in a 2:1 ratio. 1H-NMR (, CD2Cl2): 8.34 (d, 9.2 Hz, m); 8.19 (d, 7.6 Hz, h/j); 8.18 (d, 7.6 Hz, h/j); 8.14 (d, 9.2 Hz, l); 8.14 (d, 7.7 Hz, c); 8.05 (2H, s, e+f); 8.02 (t, 7.6 Hz, i); 7.89 (d, 7.7 Hz, b); 6.19 (*n*x); 6.11 (2H, *x*x+*x*y); 5.99 (*n*y); 4.18 (*AB*, 10.8 Hz, *x*s); 4.00 (*AB*, 10.8 Hz, *x*s); 3.89 (*AB*, 10.7 Hz, *n*s); 3.71 (*AB*, 10.7 Hz, *n*s); 3.40 (t, o); 2.90 (*n*t); 2.87 (*x*t); 2.83 (*n*w); 2.73 (*x*w); 2.48 (t, q); 2.40 (*n*u); 2.20 (m, p); 1.86 (*n*v*x*); 1.74 (*x*u); 1.45, 1.35, 1.31, 1.28 (*x*z+ *n*z); 1.20 (*x*v*x*); 0.59 (*n*v*n*). 13C-NMR (, CD2Cl2): 173.8 (r); 137.9 (a); 137.2 (*n*x/*n*y); 136.6 (*n*x/*n*y); 136.5 (*x*x+*x*y); 131.8 (d/g); 131.3 (k); 130.3 (d/g); 129.1 (n); 127.8 (b); 127.8 (e/f); 127.6 (l); 126.9 (e/f); 126.2 (i); 125.3; 125.2, 125.1 (h,j); 123.8 (m); 68.8 (*x*s); 68.1 (*n*s); 49.7 (*n*v); 45.2 (*x*v); 44.3 (*n*w); 44.1 (*x*w); 42.7 (*n*t); 42.0 (*x*t); 38.4 (*x*u); 38.2 (*n*u); 34.2 (o); 33.1 (q); 29.9 (*x*z); 29.3 (*n*z); 27.3 (p).

**4-Pyren-1-yl-*N*-(4-vinyl-phenyl)-butyramide** (**3**). Adapted from a literature procedure.[[5]](#endnote-6) A solution of 4-vinylaniline (349 mg, 2.93 mmol) and triethylamine (0.55 mL, 3.9 mmol) in 25 mL of CH2Cl2 was added dropwise to a cold (0 °C) solution of 4-pyren-1-yl-butyroyl chloride (982 mg, 3.2 mmol) in ca. 40 mL of CH2Cl2. The resulting mixture was stirred overnight at room temperature. A solid precipitated during this time, which did not disappear upon several washes with deionized water. The organic layer was isolated and dried with anhydrous CaCl2 prior to solvent removal using the rotary evaporator which afforded an off-white solid, poorly soluble in CH2Cl2. The solid was dissolved in chloroform and passed through a pad of silica gel. Removal of the volatiles yielded product of adequate purity (NMR) for the next step. Yield: 720 mg (62%). Alternatively, the title amide can be purified by flash column chromatography (silica gel hexanes/THF 4:1 → 1:1) in similar yields. 1H-NMR (, CDCl3): 8.32 (d, 9.3 Hz, m); 8.17 (d, 7.6 Hz, h+j); 8.12 (d, 7.8 Hz, c); 8.10 (d, 9.3 Hz, l); 8.03 (2H, s, e+f); 8.00 (t, 7.6 Hz, i); 7.88 (d, 7.8 Hz, b); 7.43 (d, v); 7.34 (d, u); 7.03 (s, s); 6.66 (dd, 17.7+10.9 Hz, x); 5.67 (d, 17.7 Hz, *t*y); 5.19 (d, 10.9 Hz, *c*y); 3.47 (t, o); 2.43 (t, q); 2.32 (m, p). 13C-NMR (, CDCl3): 170.7 (r); 137.3 (a); 136.1 (x); 135.6, 133.6 (t,w); 131.4 (d/g); 130.9 (k); 130.0 (d/g); 128.8 (n); 127.4, 127.4 126.8 (b,e,f,l,v); 125.9 (i); 125.0; 124.9, 124.8 (c,h,j); 123.3 (m); 119.6 (u); 113.0 (y); 36.8 (o); 32.5 (q); 27.1 (p).

**Bis(tricyclohexylphosphine) 4-(4-pyren-1-yl-butyrylamino)-benzylidene ruthenium(IV) dichloride** (**4**). Amide **3** (78 mg, 0.2 mmol) was dissolved in warm CH2Cl2 (ca. 15 mL) and added dropwise to Cl2(PCy3)2Ru=CHPh (**5**, 250 mg, ca. 0.3 mmol) in 5 mL of CH2Cl2. The purple solution was concentrated under vacuum and stirred at room temperature under slightly reduced pressure. After 6 h of reaction, dry diethyl ether (20 mL) was transferred to the flask (with vigorous stirring) and the resulting suspension was stirred for an additional 20 min. The purple supernatant was decanted using a cannula, and the remaining solid was washed several times with ether. The obtained pink solid was dried under vacuum. Yield: 152 mg (63%). Although a small amount of starting benzylidene can be observed in the NMR (< 5 mol % by integration of the alkylidene resonances), complex **4** was used in subsequent steps without further purification. 1H-NMR (, CDCl3): 19.9 (s, m); 8.44 (bd, v); 8.32 (d, 9.3 Hz, m); 8.17 (d, 7.6 Hz, h+j); 8.12 (d, 7.8 Hz, c); 8.11 (d, 9.3 Hz, l); 8.04 (2H, s, e+f); 8.00 (t, 7.6 Hz, i); 7.88 (d, 7.8 Hz, b); 7.47 (bd, u); 3.47 (t, o); 2.62 (b, y); 2.44 (t, q); 2.32 (m, p); 1.9-1.6, 1.4, 1.2 (m, z+A+B). 13C-NMR (, CDCl3): 170.8 (r); 149.5 (w); 138.1 (a); 135.5 (t); 132.7 (v); 131.4 (d/g); 130.9 (k); 130.0 (d/g); 128.8 (n); 127.5, 127.4, 127.4 126.8 (b,e,f,l); 125.9 (i); 125.0, 124.8, 124.8 (c,h,j); 123.3 (m); 119.0 (u); 37.0 (o); 32.5 (q); 32.1 (t, *J*CP=9.2 Hz, y); 29.6 (z); 27.8 (t, *J*CP=4.9 Hz, A); 27.0 (p); 26.5 (B).

**Nanotube growth – Sample preparation.**

TEM grids were dip-coated with a liquid catalyst comprising the tri-block copolymer P-123 (BASF), AlCl3, FeCl3, and MoO2Cl2 solubilized in an ethanol/sec-butanol solvent mixture.[[6]](#endnote-7) The grids were then calcined at 500oC for 18 hours, followed by methane/hydrogen CVD growth at 900oC with a flow rate of 1000/500 sccm for 10 minutes. This procedure resulted in a high yield of SWNTs suspended inside the grid spaces. Images of nanotubes prepared by this method show high reproducibility and give SWNTs with diameters in the range of 1-5 nm for individual tubes and up to 10 nm for bundled tubes. TEM samples are typically prepared in a batch of eight grids and show excellent reproducibility within a given grid and between grids. The nanotube imaged in the inset of Figure 1 was taken from the same batch (approx. 8 TEM grids) as the sample functionalized in Figure 1.

SiO2­-supported samples for AFM analysis were prepared from a catalyst derived from ferritin deposition from aqueous solution onto a SiO2 substrate, followed by calcination at 800oC for 5 minutes.[[7]](#endnote-8) The resulting iron nanoparticles catalyze the formation of SWNTs on the surface when the substrate is subjected to methane/hydrogen/ethylene CVD growth at 900o with a flow rate of 1000/500/20 sccm, respectively, for 10 minutes. SWNTs synthesized by this method have an average diameter of 2 nm.7

**Representative alkylidene functionalization procedure. Method A.** A gold grid containing as-grown SWNTs was placed in a 0.3 mL reaction vial adapted with a rubber septum. The vial was purged 3 with N2, and 0.2 mL of a ca. 5 mM CH2Cl2 solution of amide **3** were transferred via syringe. The tubes were incubated for 2 h at room temperature, rinsed several times with dry CH2Cl2, and dried under vacuum. Benzylidene **5** (0.2 mL of a 10 mM CH2Cl2 solution), was introduced via syringe and allowed to react with the olefin-functionalized tubes for ca. 30 min. The grids were rinsed several times with CH2Cl2 and dried under vacuum. **Method B.** A gold grid containing as-grown SWNTs was placed in a 0.3 mL reaction vial adapted with a rubber septum. The vial was purged 3 with N2, and 0.2 mL of a ca. 25 mM CH2Cl2 solution of alkylidene **4** were transferred via syringe. The tubes were incubated for 2 h at room temperature, rinsed several times with dry CH2Cl2, and dried under vacuum.

**Representative polymerization procedure.**

To a 0.3 mL reaction vial containing initiator-functionalized SWNTs on a gold grid was added 0.2 mL of a norbornene solution in toluene. At the end of the specified polymerization time, the polymerization was quenched by addition of excess methanol (in some experiments, containing a few drops of isobutyl vinyl ether) to the reaction vials. The grid was rinsed several times with pentane or hexane and dried under vacuum.

1. (a) Mathew, J. P; Reinmuth, A.; Melia, J.; Swords, N.; Risse, W. *Macromolecules* **1996**, *29*, 2755. (b) Mamedov, M. K. *Russ. J. Org. Chem.* **1998**, *34*, 178. (c) Jenny, T. F. *Helv. Chim. Acta* **1993**, *76*, 248. [↑](#endnote-ref-2)
2. (a) Reynders, P. Kuehnle, W.; Zachariasse, K. A. *J. Am. Chem. Soc.* **1990**, *112*, 3929. (b) Orendt, A. M.; Dunkel, R.; Horton, W. J.; Pugmire, R. J.; Grant, D. M. *Magn. Reson. Chem.* **1995**, *33*, 803. [↑](#endnote-ref-3)
3. (a) Schwab, P; Grubbs, R. H.; Ziller, J. W. *J. Am. Chem. Soc.* **1996**, *118*, 100. (b) Furstner, A.; Ackerman, L.; Gabor, B.; Goddart, R.; Lehmann, C. W.; Mynott, R.; Stelzer, F.; Thiel, O. R. *Chem. Eur. J.* **2001**, *7*, 3236. [↑](#endnote-ref-4)
4. Aoki, I.; Kawahara, Y.; Sakaki, T.; Harada, T.; Shinkai, S. *Bull. Chem. Soc. Jpn.* **1993**, *66*(3), 927. [↑](#endnote-ref-5)
5. Ringsdorf, H.; Venzmer, J.; Winnik, F. M. *Macromolecules* **1991**, *24*, 1678. [↑](#endnote-ref-6)
6. Y. Zhang, N. Franklin, R. J. Chen and H. Dai, *Chem. Phys. Lett.* 2000, *331*, 35. [↑](#endnote-ref-7)
7. W. Kim, H. C. Choi, M. Shim, Y. M. Li, D. Wang and H. Dai, *Nano Letters*, 2001, *3*, 703. [↑](#endnote-ref-8)
